# Supplementary material for: Characterization and Utilization of Disulfide-Bonded SARS-CoV-2 Receptor Binding Domain of Spike Protein Synthesized by Wheat Germ Cell-Free Production System
Source: MDPI journal article supplement (doi:10.3390/v14071461), 2022-07-01
Supplement: s1 [file s1]

## **Supplementary Materials**

Characterization and utilization of disulfide-bonded SARS-CoV-2 receptor binding domain of spike protein synthesized by wheat germ cell-free production system

Yutaro Yamaoka, Sundararaj Stanleyraj Jeremiah, Rikako Funabashi, Kei Miyakawa, Takeshi Morita, Yusaku Mihana, Hideaki Kato, and Akihide Ryo

**A**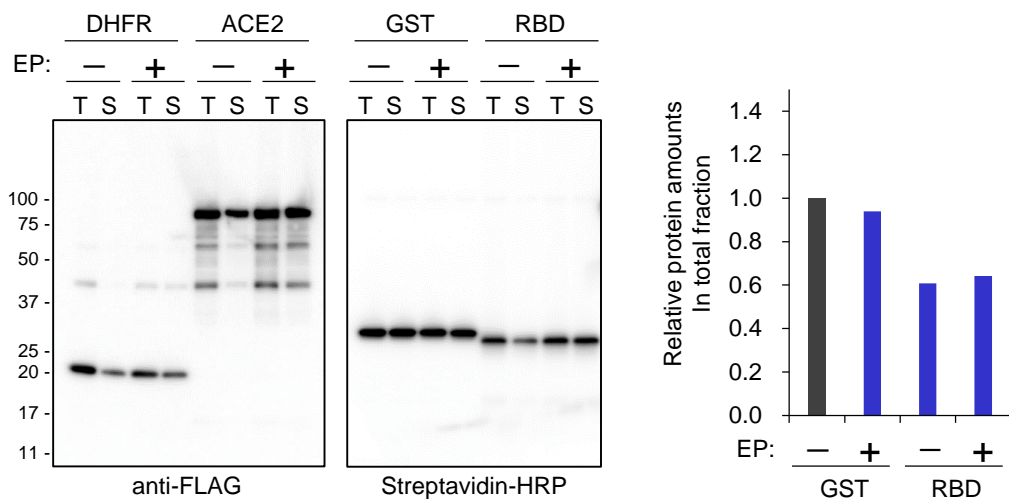**B**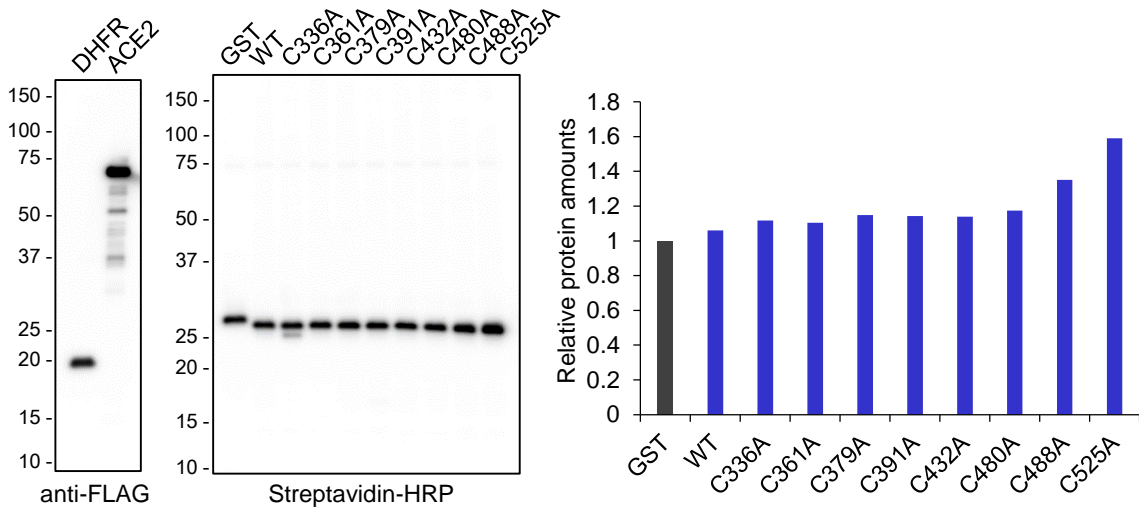

Figure S1 (Related to Figure 3): Confirmation of protein expression utilized in Figure 3. (A, B) Each protein expression was confirmed by immunoblotting using indicated antibodies. Bar charts indicate the relative protein amounts as determined by band intensity. T, Total fraction; S, Supernatant; EP, ERO1 $\alpha$  and PDI.

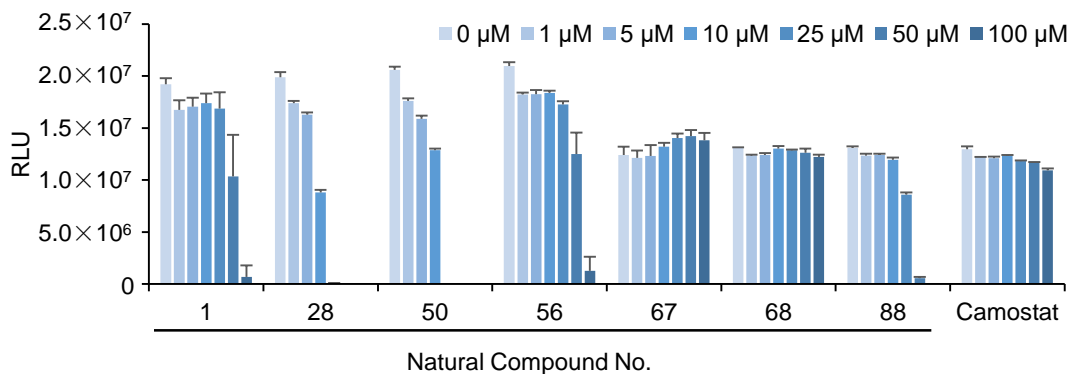

Figure S2 (Related to Figure 4): Cytotoxicity of selected natural compounds. Cell viability of VeroE6/TMPRSS2 cells treated with seven compounds and Camostat at indicated concentrations for 48 hrs.

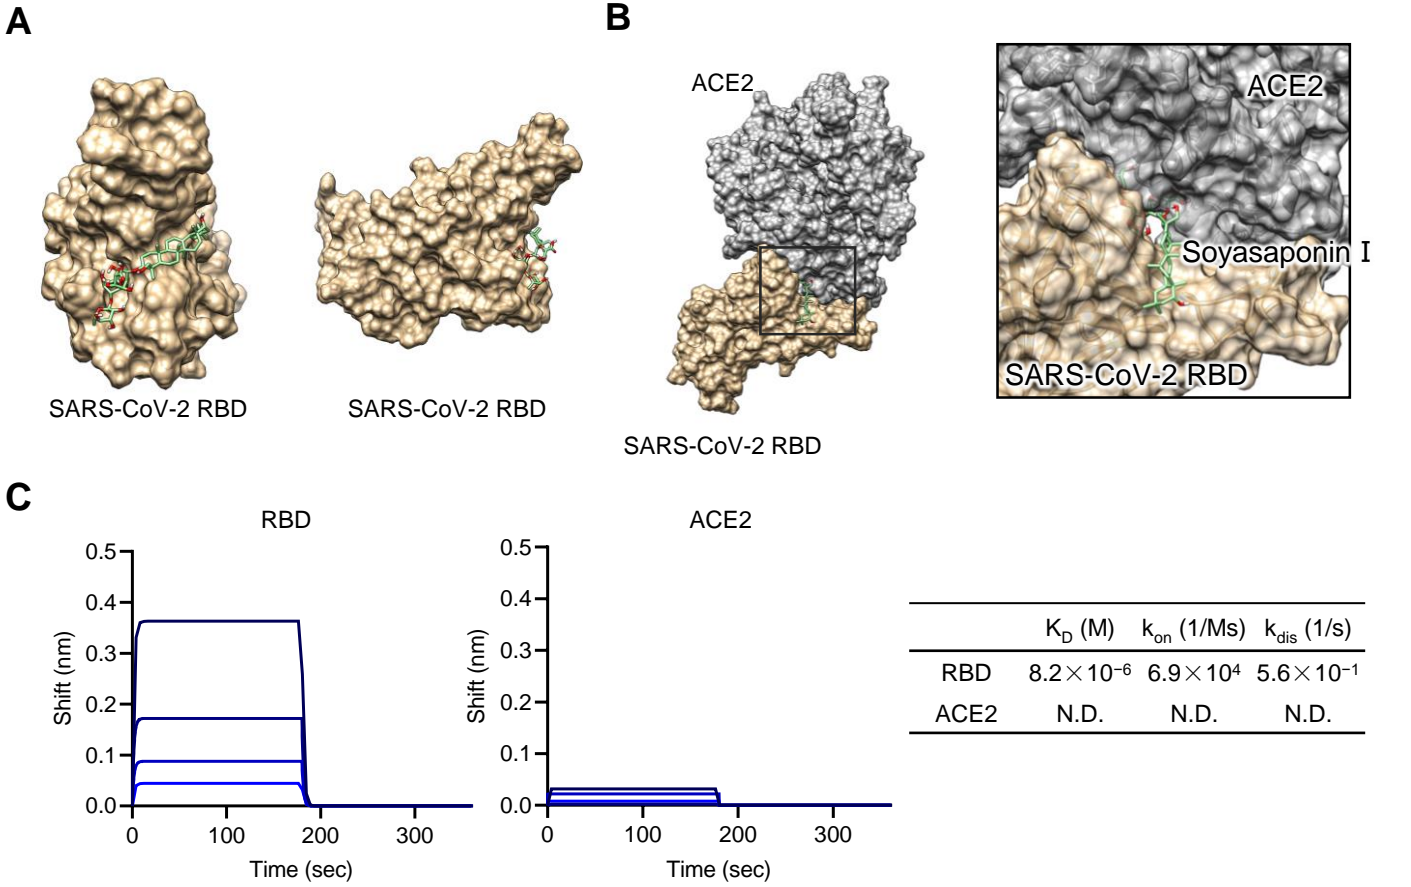

Figure S3 (Related to Figure 4): Binding analysis of Soyasaponin I against RBD. (A, B) Docking simulation analysis of Soyasaponin I against RBD. The protein structure was obtained from PDB ID 6m0j. Binding of Soyasaponin I to RBD surface was simulated at a docking score of -7.7 kcal/mol using AutoDock Vina. (C) Binding assay of Soyasaponin I against RBD. Biotinylated RBD or ACE2 was immobilized on the super streptavidin sensor and then analyzed for association with Soyasaponin I at various concentrations (250, 125, 61.3, 31.3  $\mu$ M) by OctetRED96 instrument. The  $K_D$  of Soyasaponin I for ACE2 was not determined due to poor curve fitting (N.D.).

Table S1 The list of compounds screened by the AlphaScreen assay.

| No. | Name of natural compounds                                                         |
|-----|-----------------------------------------------------------------------------------|
| 1   | Delphinidin 3-glucoside chloride                                                  |
| 2   | Cyanidin 3-glucoside chloride                                                     |
| 3   | Petunidin 3-glucoside chloride                                                    |
| 4   | Peonidin 3-glucoside chloride                                                     |
| 5   | Delphinidin 3-rutinoside chloride                                                 |
| 6   | Cyanidin 3-rutinoside chloride                                                    |
| 7   | Delphinidin chloride                                                              |
| 8   | Cyanidin chloride                                                                 |
| 9   | Cyanidin 3-sophoroside chloride                                                   |
| 10  | Cyanidin 3-(2G-glucosylrutinoside) chloride                                       |
| 11  | Delphinidin 3-galactoside chloride                                                |
| 12  | Cyanidin 3-galactoside chloride                                                   |
| 13  | Petunidin 3-galactoside chloride                                                  |
| 14  | Peonidin 3-galactoside chloride                                                   |
| 15  | Malvidin 3-galactoside chloride                                                   |
| 16  | Pelargonidin 3-glucoside chloride                                                 |
| 17  | Delphinidin 3 – sambubioside chloride                                             |
| 18  | Delphinidin 3,5-diglucoside chloride                                              |
| 19  | Cyanidin 3-sambubioside-5-glucoside chloride                                      |
| 20  | Cyanidin 3-sambubioside chloride                                                  |
| 21  | Delphinidin 3-arabinoside chloride                                                |
| 22  | Procyanidin B-1                                                                   |
| 23  | Hyperoside                                                                        |
| 24  | Tectoridin                                                                        |
| 25  | Tectorigenin                                                                      |
| 26  | 6-Hydroxygenistein 6,7-diglucoside                                                |
| 27  | Tectorigenin 7-o-xylosylglucoside                                                 |
| 28  | Licochalcone A                                                                    |
| 29  | Daidzin                                                                           |
| 30  | Daidzein                                                                          |
| 31  | Glycitin                                                                          |
| 32  | Glycitein                                                                         |
| 33  | Genistin                                                                          |
| 34  | Genistein                                                                         |
| 35  | Xanthohumol                                                                       |
| 36  | Isoquercitrin                                                                     |
| 37  | Luteolin                                                                          |
| 38  | (+)-Catechin                                                                      |
| 39  | (-)-Epicatechin                                                                   |
| 40  | (-)-Epigallocatechin                                                              |
| 41  | (-)-Epicatechin gallate                                                           |
| 42  | (-)-Epigallocatechin gallate                                                      |
| 43  | 3,5,7,3',4'-Pentamethoxyflavone                                                   |
| 44  | 5,7,4'-Trimethoxyflavone                                                          |
| 45  | 5,7-Dimethoxyflavone                                                              |
| 46  | 3,5,7-Trimethoxyflavone                                                           |
| 47  | 3,5,7,4'-tetramethoxyflavone                                                      |
| 48  | Liquiritin                                                                        |
| 49  | Liquiritigenin                                                                    |
| 50  | Glabridin                                                                         |
| 51  | Hesperidin                                                                        |
| 52  | Neohesperidin                                                                     |
| 53  | Calycosin 7-O-Glucoside                                                           |
| 54  | Quercetin 3-O-[2"-O-(6'''-O-p-Coumaroyl)-b-D-Glucopyranosyl]-a-L-Rhamnopyranoside |
| 55  | Quercetin 3-O-[2"-O-b-D-Glucopyranosyl]-a-L-Rhamnopyranoside                      |
| 56  | (-)-Gallocatechin 3-O-(3"-O-methyl)gallate                                        |
| 57  | Isoliquiritin                                                                     |
| 58  | Ganoderic acid A                                                                  |
| 59  | Corosolic acid                                                                    |
| 60  | Soyasapogenol B                                                                   |
| 61  | 18β-Glycyrrhetic acid                                                             |
| 62  | Bilobalide                                                                        |
| 63  | Ginkgolide A                                                                      |
| 64  | Ginkgolide B                                                                      |
| 65  | Ginkgolide C                                                                      |
| 66  | Glycyrrhizinic acid (Glycyrrhizin)                                                |
| 67  | Soyasaponin I                                                                     |
| 68  | Soyasaponin V                                                                     |
| 69  | Deacylgymnemic acid                                                               |
| 70  | Ginsenoside Rg1                                                                   |
| 71  | Tenuifolin                                                                        |
| 72  | Withaferin A                                                                      |
| 73  | Pteropodine(Uncarine C)                                                           |
| 74  | Isopteropodine(Uncarine E)                                                        |
| 75  | Rhynchophylline                                                                   |
| 76  | Verbascoside (acteoside)                                                          |
| 77  | Arctiin                                                                           |
| 78  | Echinacoside                                                                      |
| 79  | Isoacteoside                                                                      |
| 80  | 6-Gingerol                                                                        |
| 81  | 8-Gingerol                                                                        |
| 82  | 10-Gingerol                                                                       |
| 83  | 6-Shogaol                                                                         |
| 84  | Cryptochlorogenic acid                                                            |
| 85  | Neochlorogenic acid                                                               |
| 86  | Isochlorogenic acid A                                                             |
| 87  | Isochlorogenic acid B                                                             |
| 88  | Sennoside A                                                                       |
| 89  | Sennoside B                                                                       |
| 90  | Mangiferin                                                                        |
